# Supplementary material
Source: publisher site journal article supplement (https://www.dovepress.com/article/304074)
Supplement: Supplementary file 1 [file get_supplementary_file.php]

**Appendix : Search strategy**

Search conducted in March 2018, with a time period of 2004 to present and updated in May 2020.

**OVID-Medline**

**#1 Polypharmacy**

polypharmacy/ OR inappropriate prescribing/ OR Potentially Inappropriate Medication List/

(polypharmac* or poly-pharmac* or polypharmacotherap* or polypharmaco-therap* or polymedication* or poly-medication* or multipharmac* or multi-pharmac* or multimedication* or multi-medication* or comedication* or co-medication* or polypragmas* or poly-pragmas* or overprescri* or multimedicated or multi-medicated or polymedicated or poly-medicated

OR (Beers OR stopp) adj2 Criteria?).ti,ab

((inappropriate or wrong OR unnecessary OR over OR combined OR combination) adj2 (prescribing? OR prescription OR drug? OR medication? OR pharmacological therap* OR pharmacological treatment*)).ti,ab

**#2 Older people**

Exp aged/

(aged OR aging OR ageing OR elder* OR older*).ti,ab

(old* adj2 (people Or person OR patient)).ti,ab

**#3 Economic**

exp "costs and cost analysis"/ or "fees and charges"/ OR Health Expenditures/

(cost* OR expenditure* OR economic* OR expense* OR fee? OR financial OR burden OR oncost* OR on-cost* OR overhead).ti,ab

**Embase**

**#1 Polypharmacy**

'polypharmacy'/exp OR 'inappropriate prescribing'/exp OR 'potentially inappropriate medication'/exp

(polypharmac* or poly-pharmac* or polypharmacotherap* or polypharmaco-therap* or polymedication* or poly-medication* or multipharmac* or multi-pharmac* or multimedication* or multi-medication* or comedication* or co-medication* or polypragmas* or poly-pragmas* or overprescri* or multimedicated or multi-medicated or polymedicated or poly-medicated

OR (Beers OR stopp) NEAR/2 Criteria?):ti,ab

((inappropriate or wrong OR unnecessary OR over OR combined OR combination) adj2 (prescribing? OR prescription OR drug? OR medication? OR pharmacological therap* OR pharmacological treatment*)):ti,ab

**#2 Older people**

'aged'/exp

(aged OR aging OR ageing OR elder* OR older*):ti,ab

(old* NEAR/2 (people Or person OR patient)):ti,ab

**#3 Economic**

'health care cost'/exp OR 'fee'/exp OR 'cost benefit analysis'/exp

(cost* OR expenditure* OR economic* OR expense* OR fee? OR financial OR burden OR oncost* OR on-cost* OR overhead):ti,ab

**CINAHL**

**#1 Polypharmacy**

MH "Therapeutics"/ OR MH "Drug Therapy" / OR MH "Inappropriate Prescribing"

TI (polypharmac* or poly-pharmac* or polypharmacotherap* or polypharmaco-therap* or polymedication* or poly-medication* or multipharmac* or multi-pharmac* or multimedication* or multi-medication* or comedication* or co-medication* or polypragmas* or poly-pragmas* or overprescri* or multimedicated or multi-medicated or polymedicated or poly-medicated

OR (Beers OR stopp) N2 Criteria?)

AB (polypharmac* or poly-pharmac* or polypharmacotherap* or polypharmaco-therap* or polymedication* or poly-medication* or multipharmac* or multi-pharmac* or multimedication* or multi-medication* or comedication* or co-medication* or polypragmas* or poly-pragmas* or overprescri* or multimedicated or multi-medicated or polymedicated or poly-medicated

OR (Beers OR stopp) N2 Criteria?)

TI ((inappropriate or wrong OR unnecessary OR over OR combined OR combination) adj2 (prescribing? OR prescription OR drug? OR medication? OR pharmacological therap* OR pharmacological treatment*))

AB ((inappropriate or wrong OR unnecessary OR over OR combined OR combination) adj2 (prescribing? OR prescription OR drug? OR medication? OR pharmacological therap* OR pharmacological treatment*))

**#2 Older people**

MH "Aged+"

TI (aged OR aging OR ageing OR elder* OR older*)

AB (aged OR aging OR ageing OR elder* OR older*)

TI (old* N2 (people Or person OR patient))

AB (old* N2 (people Or person OR patient))

**#3 Economic**

MH "Costs and Cost Analysis" / or MH "Health Care Costs" / OR MH "Fees and Charges"

TI (cost* OR expenditure* OR economic* OR expense* OR fee? OR financial OR burden OR oncost* OR on-cost* OR overhead)

AB (cost* OR expenditure* OR economic* OR expense* OR fee? OR financial OR burden OR oncost* OR on-cost* OR overhead)

**Ageline**

**#1 Polypharmacy**

DE "Polypharmacy"

TI (polypharmac* or poly-pharmac* or polypharmacotherap* or polypharmaco-therap* or polymedication* or poly-medication* or multipharmac* or multi-pharmac* or multimedication* or multi-medication* or comedication* or co-medication* or polypragmas* or poly-pragmas* or overprescri* or multimedicated or multi-medicated or polymedicated or poly-medicated

OR (Beers OR stopp) N2 Criteria#)

AB (polypharmac* or poly-pharmac* or polypharmacotherap* or polypharmaco-therap* or polymedication* or poly-medication* or multipharmac* or multi-pharmac* or multimedication* or multi-medication* or comedication* or co-medication* or polypragmas* or poly-pragmas* or overprescri* or multimedicated or multi-medicated or polymedicated or poly-medicated

OR (Beers OR stopp) N2 Criteria#)

TI ((inappropriate or wrong OR unnecessary OR over OR combined OR combination) N2 (prescribing# OR prescription OR drug# OR medication# OR pharmacological therap* OR pharmacological treatment*))

AB ((inappropriate or wrong OR unnecessary OR over OR combined OR combination) N2 (prescribing# OR prescription OR drug# OR medication# OR pharmacological therap* OR pharmacological treatment*))

**#2 Older people**

DE "Older Adults" / OR DE "Aging"

TI (aged OR aging OR ageing OR elder* OR older*)

AB (aged OR aging OR ageing OR elder* OR older*)

TI (old* N2 (people Or person OR patient))

AB (old* N2 (people Or person OR patient))

**#3 Economic**

DE "Drug Costs" / OR DE "Service Costs" / OR DE "Cost Effectiveness" / OR DE "Health Service Costs" / OR DE "Fee for Service" / OR DE "Out of Pocket Expenditures"

TI (cost* OR expenditure* OR economic* OR expense* OR fee? OR financial OR burden OR oncost* OR on-cost* OR overhead)

AB (cost* OR expenditure* OR economic* OR expense* OR fee? OR financial OR burden OR oncost* OR on-cost* OR overhead)

**Cochrane**

**#1 Polypharmacy**

MeSH descriptor: [Polypharmacy] explode all trees / OR MeSH descriptor: [Inappropriate Prescribing] explode all trees / OR MeSH descriptor: [Potentially Inappropriate Medication List]

(polypharmac* or poly-pharmac* or polypharmacotherap* or polypharmaco-therap* or polymedication* or poly-medication* or multipharmac* or multi-pharmac* or multimedication* or multi-medication* or comedication* or co-medication* or polypragmas* or poly-pragmas* or overprescri* or multimedicated or multi-medicated or polymedicated or poly-medicated

OR (Beers OR stopp) NEAR/2 Criteria?):ti,ab

((inappropriate or wrong OR unnecessary OR over OR combined OR combination) adj2 (prescribing? OR prescription OR drug? OR medication? OR pharmacological therap* OR pharmacological treatment*)):ti,ab

**#2 Older people**

MeSH descriptor: [Middle Aged] explode all trees

(aged OR aging OR ageing OR elder* OR older*):ti,ab

(old* NEAR/2 (people Or person OR patient)):ti,ab

**#3 Economic**

MeSH descriptor: [Costs and Cost Analysis] explode all trees / OR / or MeSH descriptor: [Fees and Charges] explode all trees / MeSH descriptor: [Health Expenditures] explode all trees

(cost* OR expenditure* OR economic* OR expense* OR fee? OR financial OR burden OR oncost* OR on-cost* OR overhead):ti,ab

**Web of science**

**#1 Polypharmacy**

(polypharmac* or poly-pharmac* or polypharmacotherap* or polypharmaco-therap* or polymedication* or poly-medication* or multipharmac* or multi-pharmac* or multimedication* or multi-medication* or comedication* or co-medication* or polypragmas* or poly-pragmas* or overprescri* or multimedicated or multi-medicated or polymedicated or poly-medicated

OR (Beers OR stopp) NEAR/2 Criteria$)

((inappropriate or wrong OR unnecessary OR over OR combined OR combination) NEAR/2 (prescribing$ OR prescription OR drug$ OR medication$ OR "pharmacological treatment*" OR "pharmacological therap*"))

**#2 Older people**

(aged OR aging OR ageing OR elder* OR older*)

(old* NEAR/2 (people Or person OR patient))

**#3 Economic**

(cost* OR expenditure* OR economic* OR expense* OR fee$ OR financial OR burden OR oncost* OR on-cost* OR overhead)

Filters: PHARMACOLOGY PHARMACY OR RHEUMATOLOGY OR BIOTECHNOLOGY APPLIED MICROBIOLOGY OR GENERAL INTERNAL MEDICINE OR OPHTHALMOLOGY OR CELL BIOLOGY OR GERIATRICS GERONTOLOGY OR ANESTHESIOLOGY OR HEALTH CARE SCIENCES SERVICES OR MICROBIOLOGY OR LIFE SCIENCES BIOMEDICINE OTHER TOPICS OR PUBLIC ENVIRONMENTAL OCCUPATIONAL HEALTH OR ORTHOPEDICS OR PSYCHIATRY OR ALLERGY OR NEUROSCIENCES NEUROLOGY OR LEGAL MEDICINE OR CARDIOVASCULAR SYSTEM CARDIOLOGY OR PARASITOLOGY OR PATHOLOGY OR INFECTIOUS DISEASES OR INTEGRATIVE COMPLEMENTARY MEDICINE OR RESEARCH EXPERIMENTAL MEDICINE OR ENDOCRINOLOGY METABOLISM OR SUBSTANCE ABUSE OR BUSINESS ECONOMICS OR BIOCHEMISTRY MOLECULAR BIOLOGY OR DERMATOLOGY OR ONCOLOGY OR HEMATOLOGY OR DENTISTRY ORAL SURGERY MEDICINE OR PSYCHOLOGY OR OTORHINOLARYNGOLOGY OR NURSING OR RESPIRATORY SYSTEM OR MEDICAL ETHICS OR GASTROENTEROLOGY HEPATOLOGY OR MEDICAL LABORATORY TECHNOLOGY OR UROLOGY NEPHROLOGY OR BEHAVIORAL SCIENCES OR PHYSIOLOGY OR TOXICOLOGY OR BIOMEDICAL SOCIAL SCIENCES OR PUBLIC ADMINISTRATION OR NUTRITION DIETETICS OR EMERGENCY MEDICINE OR RADIOLOGY NUCLEAR MEDICINE MEDICAL IMAGING OR MEDICAL INFORMATICS OR SURGERY OR TROPICAL MEDICINE OR IMMUNOLOGY
